# Supplementary material for: Construction of an Immune Escape-Related Signature in Clear Cell Renal Cell Carcinoma and Identification of the Relationship between IFNAR1 and Immune Infiltration by Multiple Immunohistochemistry
Source: MDPI journal article supplement (doi:10.3390/cancers15010169), 2022-12-28
Supplement: s1 [file s1]

## Supplementary Materials

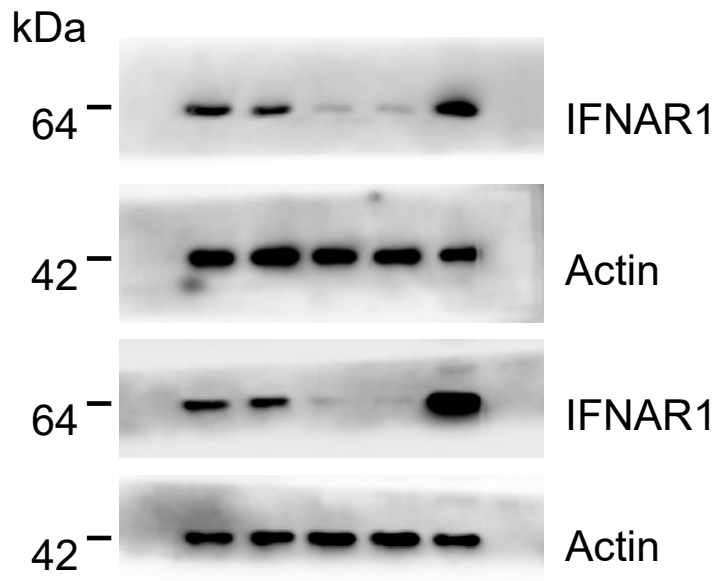

The uncropped Western blot figures related to Figure 8A.

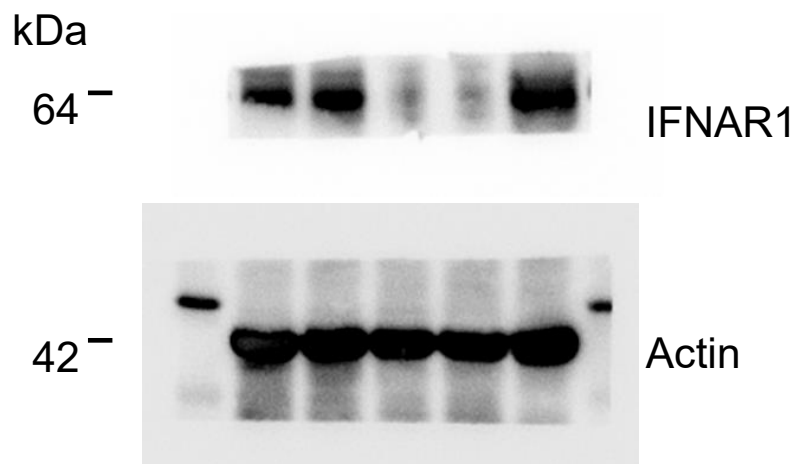

The uncropped Western blot figures related to Supplementary figure2C.
